# Supplementary material for: Plasma biomarkers of amyloid, tau, axonal, and neuroinflammation pathologies in dementia with Lewy bodies
Source: PubMed Central journal article supplement (PMC11221164; doi:10.1186/s13195-024-01502-y), 2024-07-03
Supplement: 13195_2024_1502_MOESM1_ESM.pdf [file 13195_2024_1502_MOESM1_ESM.pdf]

## **Plasma biomarkers of amyloid, tau, axonal and neuroinflammation pathologies in dementia with Lewy bodies**

Agathe Vrillon, Olivier Bousiges, Karl Götze, Catherine Demuynck, Candice Muller, Alix Ravier, Benoit Schorr, Nathalie Philippi, Claire Hourregue, Emmanuel Cognat, Julien Dumurgier, Matthieu Lilamand, Benjamin Cretin, Frederic Blanc, Claire Paquet.

### **Supplementaries**

**Supplementary Figure 1, Sensitivity analysis including only A+T+ AD subjects for plasma biomarkers levels and diagnosis performance**

Supplementary Figure 2, Correlation between plasma biomarkers in the whole cohort and in the diagnosis subgroups

**Supplementary Figure 3, Plasma biomarkers levels and their diagnosis performance, including AD-MCI and AD dementia groups**

**Supplementary Table 1, CSF AD biomarkers measurements methods and cut-offs for Strasbourg and Paris cohorts**

Supplementary Table 2, Cohort characteristics and plasma biomarkers levels by center

**Supplementary Table 3, Cohort characteristics and plasma biomarkers levels including AD-MCI and AD dementia groups**

Supplementary Table 4, Association of plasma biomarkers with age, sex, and APOE  $\epsilon$ 4 carriership in the whole cohort and diagnosis subgroups

Supplementary Table 5, Plasma biomarkers performance for diagnosis

Supplementary Table 6, Association of MMSE with plasma biomarkers levels in the whole cohort and in the diagnosis subgroups

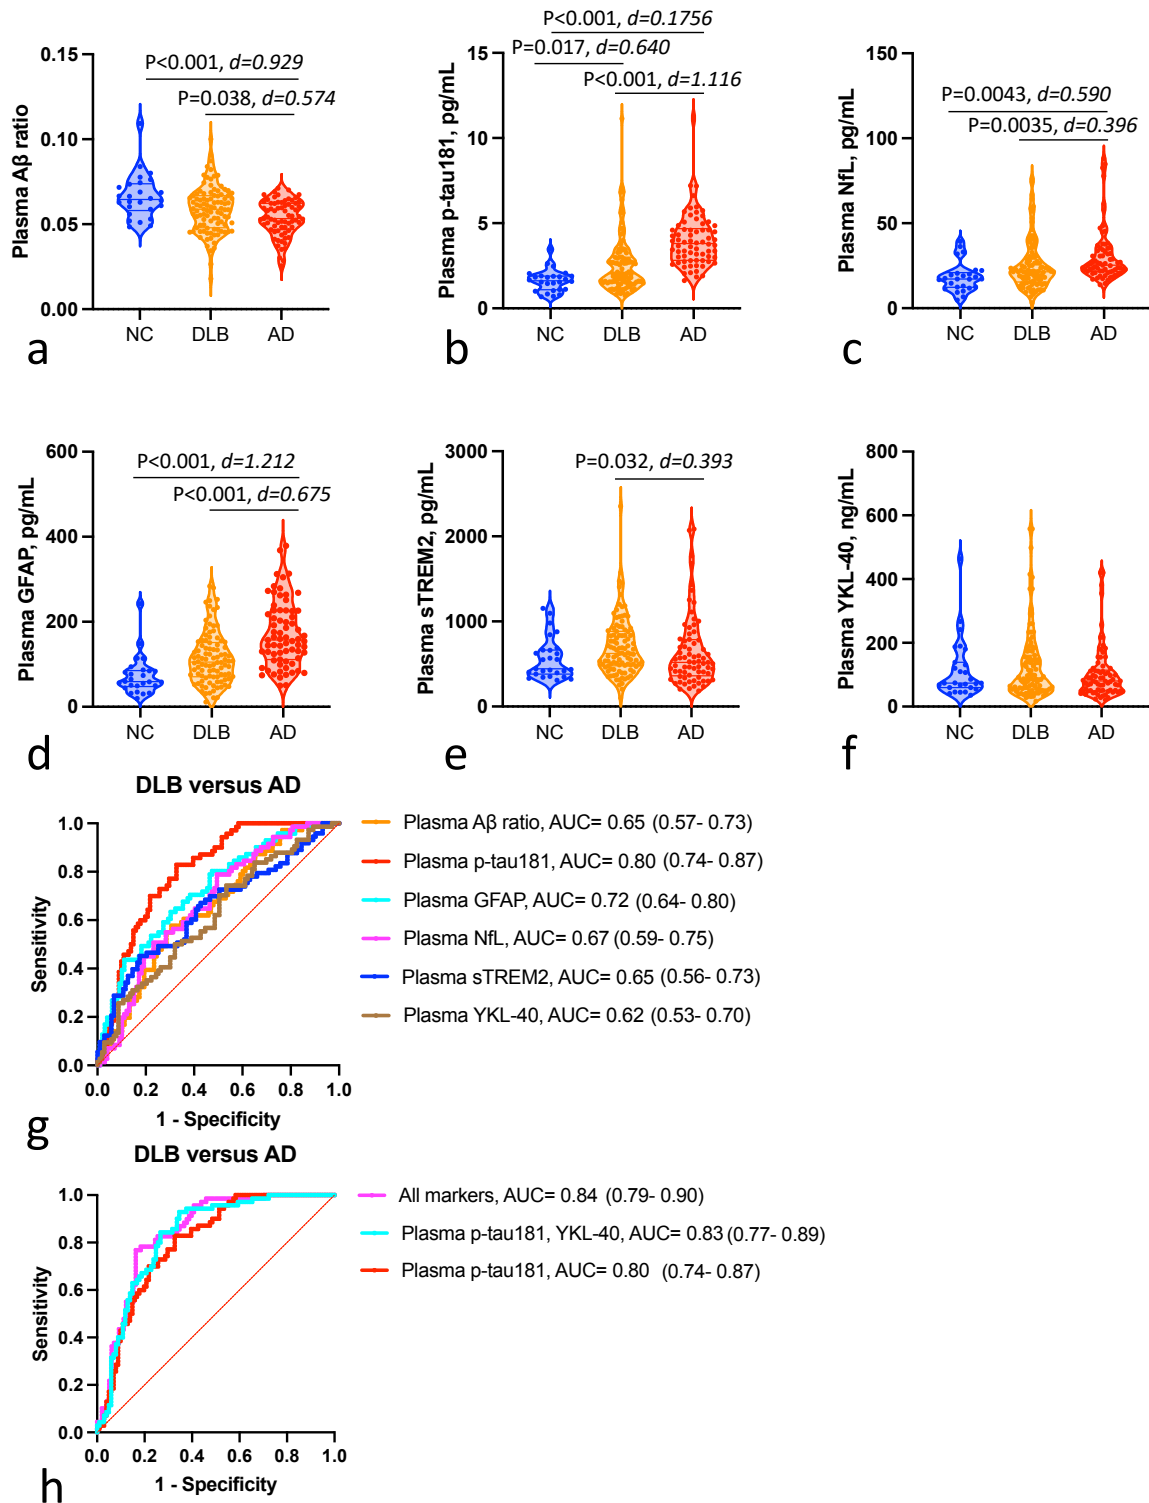

**Supplementary Figure 1, Sensitivity analysis including only A+T+ AD subjects for plasma biomarkers levels and diagnosis performance**

Plasma biomarkers levels across diagnosis groups including **a**, Plasma A $\beta$  ratio; **b**, plasma p-tau181; **c**, plasma NfL; **d**, plasma GFAP; **e**, plasma sTREM2; and **f**, plasma YKL-40. P-values were obtained through one-way ANCOVA followed by post hoc Tukey's test, adjusting for

multiple comparisons. Significant differences ( $P < 0.05$ ) are reported. The effect size was determined using Cohen's  $d$ . Boxplots display the median, IQR, and individual points for all participants.

ROC analysis: **g**, to compare single biomarkers performance to discriminate between DLB and AD patients; **h**, to compare biomarkers combination to discriminate between DLB and AD patients

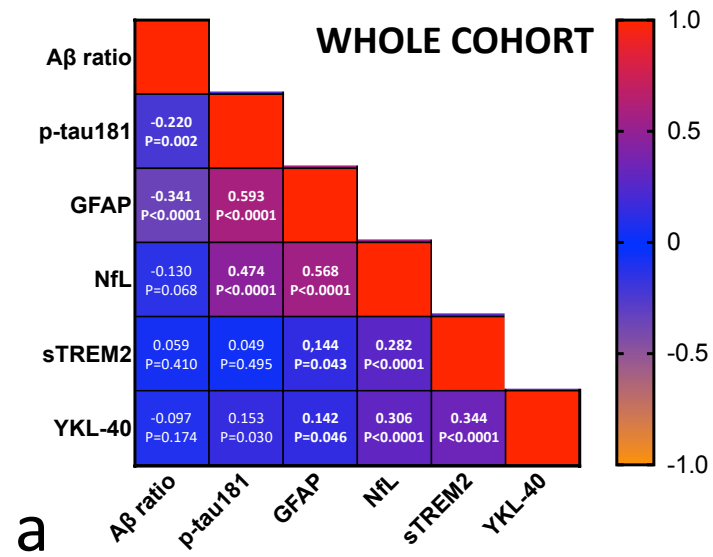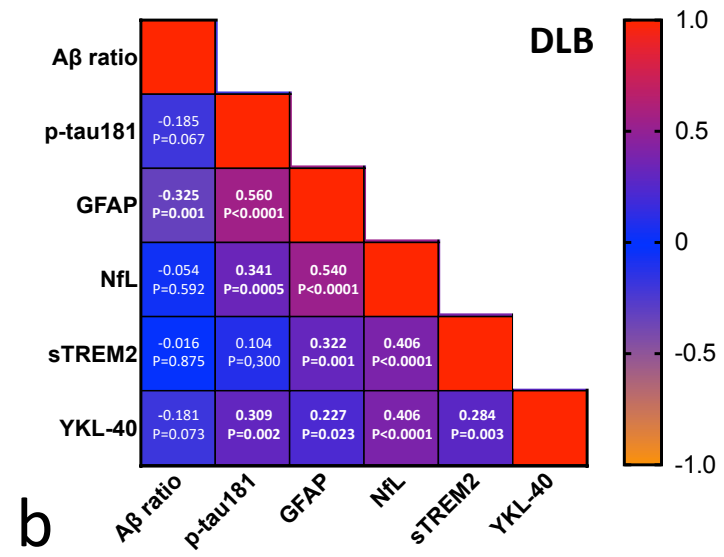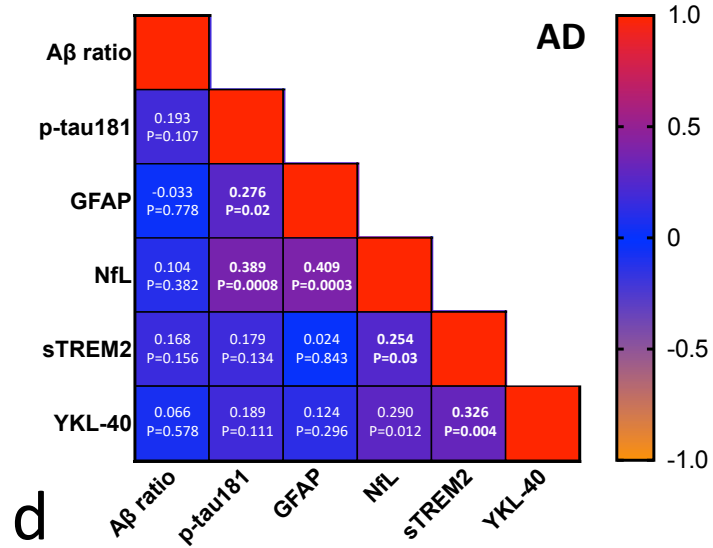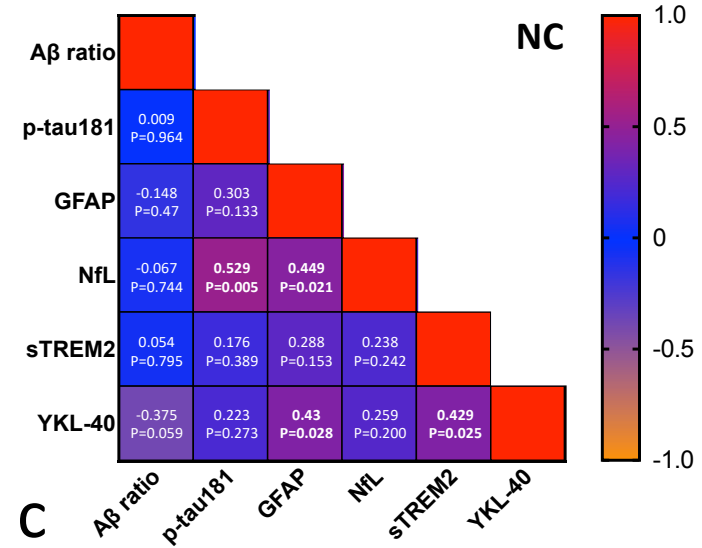

**Supplementary Figure 2, Correlation between plasma biomarkers in the whole cohort and in the diagnosis subgroups**

Correlation of plasma biomarkers in a, the whole cohort; b, DLB group; c, AD group; d, neurological controls. Correlations were computed with Spearman's correlation. Results are displayed as rho, P-value. Significant correlations ( $P < 0.05$ ) are indicated in bold.

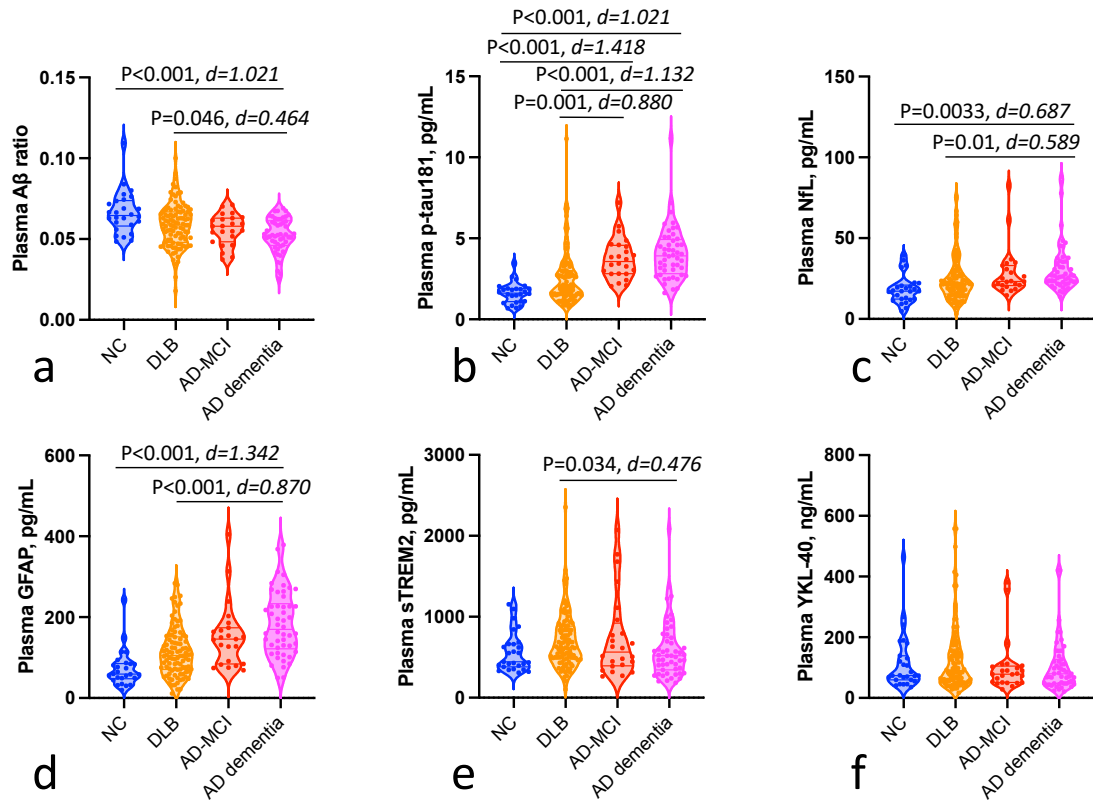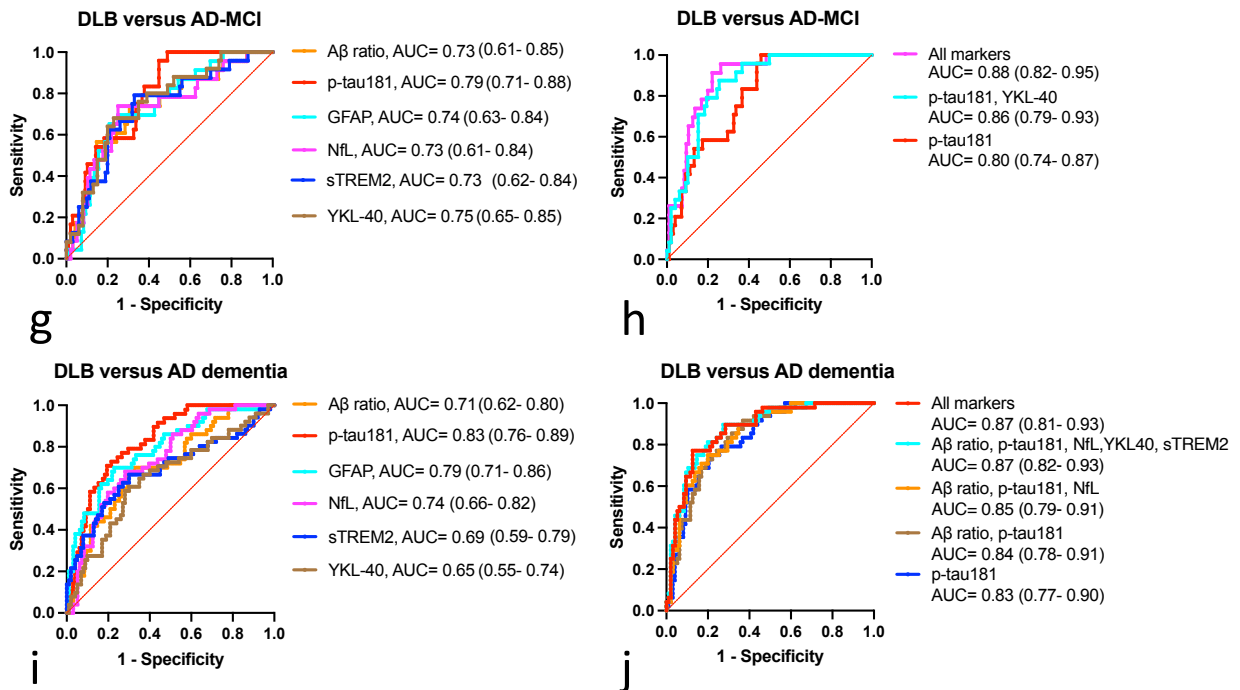

**Supplementary Figure 3, Plasma biomarkers levels and their diagnosis performance, including AD-MCI and AD dementia groups**

Plasma biomarkers levels across diagnosis groups including **a**, Plasma Aβ ratio; **b**, plasma p-tau181; **c**, plasma NfL; **d**, plasma GFAP; **e**, plasma sTREM2; and **f**, plasma YKL-40. P-values

were obtained through one-way ANCOVA followed by post hoc Tukey's test, adjusting for multiple comparisons. Significant differences ( $P < 0.05$ ) are reported. The effect size was determined using Cohen's *d*. Boxplots display the median, IQR, and individual points for all participants.

ROC analysis: **g**, to compare single biomarkers performance to discriminate between DLB and AD-MCI patients; **h**, to compare biomarkers combination to discriminate between DLB and AD-MCI patients; **i**, to compare single biomarkers performance to discriminate between DLB and AD dementia patients; **j**, to compare biomarkers combination to discriminate between DLB and AD dementia patients. ROC analysis results are presented as AUC (95% CI). Combinations of biomarkers were selected through binary logistic regression with backward stepwise elimination, including age and sex as constant variables.

| Assay                                                                                                                                                              | A $\beta$ 42  | A $\beta$ 42/<br>A $\beta$ 40 ratio | P-tau     | T-tau         | References for used cut-offs                                                                                                                                                                                                           |
|--------------------------------------------------------------------------------------------------------------------------------------------------------------------|---------------|-------------------------------------|-----------|---------------|----------------------------------------------------------------------------------------------------------------------------------------------------------------------------------------------------------------------------------------|
| <b>Strasbourg Cohort</b>                                                                                                                                           |               |                                     |           |               |                                                                                                                                                                                                                                        |
| <b>Innotest Fujirebio<sup>®</sup></b><br>n= 58                                                                                                                     | <500<br>pg/mL | >0.1                                | <60 pg/mL | <500<br>pg/mL | Manufacturer recommendations                                                                                                                                                                                                           |
| <b>Lumipulse<sup>®</sup></b><br>n=3                                                                                                                                | <600<br>pg/mL | >0.05                               | <75 pg/mL | <500<br>pg/mL | A $\beta$ 42, A $\beta$ 42/A $\beta$ 40 ratio cut-offs: manufacturer recommendations (Ref 00008, 02/13/2019)<br>p-tau and t-tau cut-offs: derived from the centre's population                                                         |
| <b>Paris Cohort</b>                                                                                                                                                |               |                                     |           |               |                                                                                                                                                                                                                                        |
| <b>Innotest Fujirebio<sup>®</sup> 1</b><br>n=4                                                                                                                     | <815<br>pg/mL | >0.064                              | <58 pg/mL | <300<br>pg/mL | Published in Dumurgier J, et al. Intersite variability of CSF Alzheimer's disease biomarkers in clinical setting. <i>Alzheimers Dement.</i> 2013                                                                                       |
| <b>Innotest Fujirebio<sup>®</sup> 2</b><br>n=26                                                                                                                    | <730<br>pg/mL | >0.076                              | <58 pg/mL | <340<br>pg/mL | Manufacturer recommendations                                                                                                                                                                                                           |
| <b>Roche Elecsy<sup>®</sup></b><br><b>(A<math>\beta</math>42, p-tau, t-tau) /</b><br><b>Innotest Fujirebio<sup>®</sup></b><br><b>(A<math>\beta</math>40) n=101</b> | >850<br>pg/mL | >0.083                              | <22 pg/mL | <225<br>pg/mL | Roche <sup>®</sup> : derived from the centre's population, published previously in Regy et al, ART 2023; Lilamand et al, The Journals of Gerontology: Series A 2023.<br>Innotest Fujirebio <sup>®</sup> : manufacturer recommendations |

**Supplementary Figure 1, CSF AD biomarkers measurements methods and cut-offs for Strasbourg and Paris cohorts**



|                                 | PARIS Lariboisière |                 |                 | STRASBOURG CMRR |                  |                 |
|---------------------------------|--------------------|-----------------|-----------------|-----------------|------------------|-----------------|
|                                 | NC                 | AD              | DLB             | NC              | AD               | DLB             |
| <b>Total n=207</b>              | n=19               | n=71            | n=56            | n=8             | n=5              | n=48            |
| Age, years                      | 61.3 [8.60]        | 72.0 [12.6]     | 72.2 [7.47]     | 60.5 [8.50]     | 77.0 [2.00]      | 68.0 [12.8]     |
| Sex, male                       | 30% (6)            | 39% (28)        | 69% (38)        | 25% (2)         | 40% (2)          | 46% (22)        |
| APOE ε4 carriership*            | 35% (11/17)        | 70% (45/64)     | 47% (15/32)     | 25% (2)         | 40% (2)          | 33% (16)        |
| MMSE                            | 28.5 [2.75]        | 19.0 [5.75]     | 24.0 [6.00]     | 28.5 [1.0]      | 22 [6.00]        | 27.0 [5.00]     |
| Level of education, years       | 15 [3.00]          | 9 [6.00]        | 11.0 [6.00]     | 15 [3.00]       | 11 [1.00]        | 11 [6.00]       |
| <b>Plasma biomarkers levels</b> |                    |                 |                 |                 |                  |                 |
| Plasma Aβ ratio                 | 0.0646 [0.0101]    | 0.0587 [0.0151] | 0.0530 [0.0151] | 0.0637 [0.0233] | 0.0591 [0.00873] | 0.0592 [0.0201] |
| Plasma GFAP, pg/mL              | 1.51 [0.847]       | 1.87 [1.56]     | 3.85 [1.80]     | 1.79 [0.253]    | 3.18 [1.25]      | 2.10 [1.45]     |
| Plasma NfL, pg/mL               | 69.1 [34.8]        | 105 [75.9]      | 162 [99.2]      | 57.1 [27.9]     | 91.4 [26.6]      | 114 [93.3]      |
| Plasma p-tau181, pg/mL          | 15.1 [8.84]        | 21.5 [13.5]     | 25.3 [13.4]     | 18.8 [3.54]     | 26.4 [5.08]      | 21.5 [12.7]     |
| Plasma sTREM2, pg/mL            | 568 [288]          | 539 [417]       | 510 [355]       | 418 [162]       | 1111 [470]       | 729 [432]       |
| Plasma YKL-40, ng/mL            | 74.6 [95.7]        | 83.6 [106]      | 77.5 [66.7]     | 70.5 [51.4]     | 89.6 [26.3]      | 96.4 [101]      |

**Supplementary Table 2, Cohort characteristics and plasma biomarkers levels presented by center**

Continuous variables are presented as median [IQR] and categorical data as number (%).

Abbreviations: AD, Alzheimer disease; AUC, area under the curve; DLB, dementia with Lewy bodies; GFAP, glial fibrillary acidic protein; NC, neurological controls; MMSE, mini mental state examination; NfL, neurofilament light chain.

|                                 | <b>NC</b>       | <b>DLB</b>      | <b>AD MCI</b>   | <b>AD dementia</b> | <b>P-value</b>      |
|---------------------------------|-----------------|-----------------|-----------------|--------------------|---------------------|
| <b>Total n=207</b>              | n=27            | n=104           | n=25            | n=51               |                     |
| Age, year                       | 61.3 [10.0]     | 71.2 [11.4]     | 76.7 [7.9]      | 69.1 [14.8]        | <0.001 <sup>a</sup> |
| Sex, male                       | 41% (11)        | 59% (61)        | 56% (14)        | 33% (17)           | <sup>b</sup> 0.018  |
| APOE ε4 carriership             | 32% (8/17)      | 39% (31/79)     | 57% (13/23)     | 67% (34/46)        | <0.001 <sup>b</sup> |
| MMSE                            | 28.5 [3.00]     | 25 [5.75]       | 26 [4]          | 18 [4]             | <0.001 <sup>a</sup> |
| Level of education, year        | 15.0 [5.0]      | 11.0 [6.0]      | 15.0 [4.0]      | 9 [4.5]            | <0.001 <sup>a</sup> |
| <b>Plasma biomarkers levels</b> |                 |                 |                 |                    |                     |
| Plasma Aβ40/Aβ42 ratio          | 0.0646 [0.0140] | 0.0589 [0.0181] | 0.0579 [0.0146] | 0.0524 [0.0151]    | <0.001              |
| Plasma GFAP, pg/mL              | 59.4 [35.3]     | 107 [81.5]      | 146.0 [89.4]    | 169.5 [111.7]      | <0.001              |
| Plasma NfL, pg/mL               | 17.2 [7.95]     | 21.5 [14.0]     | 23.2 [12.4]     | 26.6 [13.2]        | <0.001              |
| Plasma p-tau181, pg/mL          | 1.62 [0.788]    | 2.03 [1.52]     | 3.57 [1.76]     | 3.92 [2.12]        | <0.001              |
| Plasma sTREM2, pg/mL            | 444 [274]       | 629 [397]       | 563.9 [527.3]   | 517.7 [396.5]      | 0.054               |
| Plasma YKL-40, ng/mL            | 73.7 [75.3]     | 87.7 [103]      | 78.38 [54.10]   | 79.97 [79.40]      | 0.068               |

**Supplementary Table 3. Cohort characteristics and plasma biomarkers levels including AD-MCI and AD dementia groups**

Continuous variables are presented as median [IQR] and categorical data as number (%).

<sup>a</sup> Age, MMSE scores and level of education were compared between groups using Kruskal-Wallis test. <sup>b</sup> APOE ε4 carriership frequency was compared between groups using Chi2 test. \*In-between groups comparison of plasma biomarkers levels was performed using one-way ANCOVA adjusted on age and sex.

|                        |              | Age                        |                                             | Sex               |                                             | ApoE4 status      |                                           |
|------------------------|--------------|----------------------------|---------------------------------------------|-------------------|---------------------------------------------|-------------------|-------------------------------------------|
|                        |              | Unadjusted                 | Adjusted on sex and ApoE4 status            | Unadjusted        | Adjusted on age and ApoE4 status            | Unadjusted        | Adjusted on age and sex                   |
| Plasma A $\beta$ ratio | Whole cohort | r=-0.131, P= 0.066         | $\beta$ =-0.042, P=0.593                    | P=0.961           | $\beta$ =0.020, P=0.803                     | <b>P=0.002</b>    | <b><math>\beta</math>=-0.228, P=0.004</b> |
|                        | DLB          | r=-0.133, P=0.190          | $\beta$ =-0.098, P=0.405                    | P=0.694           | $\beta$ =0.008, P=0.942                     | P=0.137           | $\beta$ =-0.142, P=0.233                  |
|                        | AD           | <b>r=0.215, P=0.068</b>    | <b><math>\beta</math>=0.263, P=0.037</b>    | P=0.485           | $\beta$ =0.046, P=0.711                     | P=0.076           | <b><math>\beta</math>=0.250, P=0.042</b>  |
|                        | NC           | r=-0.126, P=0.538          | $\beta$ =-0.190, P=0.852                    | P=0.087           | $\beta$ =0.200, P=0.404                     | P=0.653           | $\beta$ =-0.174, P=0.434                  |
| Plasma p-tau181        | Whole cohort | <b>r=0.254, P&lt;0.001</b> | <b><math>\beta</math>=0.261, P&lt;0.001</b> | P=0.913           | $\beta$ =0.039, P=0.598                     | <b>P&lt;0.001</b> | <b><math>\beta</math>=0.220, P=0.004</b>  |
|                        | DLB          | <b>r=0.267, P=0.007</b>    | <b><math>\beta</math>=0.247, P=0.030</b>    | P=0.311           | $\beta$ =0.096, P=0.393                     | P=0.079           | $\beta$ =0.183, P=0.106                   |
|                        | AD           | r=-0.113, P=0.345          | $\beta$ =-0.068, P=0.601                    | P=0.399           | $\beta$ =0.156, P=0.231                     | P=0.853           | $\beta$ =-0.008, P=0.950                  |
|                        | NC           | r=0.325, P=0.106           | $\beta$ =0.321, P=0.173                     | P=1.000           | $\beta$ =0.024, P=0.917                     | P=0.787           | $\beta$ =0.068, P=0.754                   |
| Plasma GFAP            | Whole cohort | <b>r=0.393, P&lt;0.001</b> | <b><math>\beta</math>=0.464, P&lt;0.001</b> | <b>P=0.011</b>    | <b><math>\beta</math>=0.258, P&lt;0.001</b> | <b>P=0.013</b>    | $\beta$ =0.091, P=0.181                   |
|                        | DLB          | <b>r=0.541, P&lt;0.001</b> | <b><math>\beta</math>=0.521, P&lt;0.001</b> | <b>P=0.012</b>    | <b><math>\beta</math>=0.259, P=0.008</b>    | P=0.214           | $\beta$ =0.009, P=0.927                   |
|                        | AD           | r=0.052, P=0.664           | $\beta$ =0.125, P=0.322                     | P=0.095           | <b><math>\beta</math>=0.291, P=0.023</b>    | P=0.676           | $\beta$ =-0.092, P=0.455                  |
|                        | NC           | <b>r=0.591, P=0.001</b>    | <b><math>\beta</math>=0.609, P=0.004</b>    | P=0.878           | $\beta$ =0.063, P=0.745                     | P=0.569           | $\beta$ =0.172, P=0.344                   |
| Plasma NfL             | Whole cohort | <b>r=0.485, P&lt;0.001</b> | <b><math>\beta</math>=0.538, P&lt;0.001</b> | P=0.614           | $\beta$ =0.073, P=0.278                     | <b>P=0.054</b>    | $\beta$ =0.055, P=0.412                   |
|                        | DLB          | <b>r=0.422, P&lt;0.001</b> | <b><math>\beta</math>=0.490, P&lt;0.001</b> | P=0.683           | $\beta$ =0.106, P=0.302                     | P=0.867           | $\beta$ =-0.087, P=0.401                  |
|                        | AD           | <b>r=0.377, P=0.001</b>    | <b><math>\beta</math>=0.401, P=0.001</b>    | P=0.485           | $\beta$ =0.028, P=0.812                     | P=0.264           | $\beta$ =0.078, P=0.507                   |
|                        | NC           | <b>r=0.649, P&lt;0.001</b> | <b><math>\beta</math>=0.630, P=0.003</b>    | P=0.357           | $\beta$ =0.064, P=0.730                     | P=0.928           | $\beta$ =0.009, P=0.957                   |
| Plasma sTREM2          | Whole cohort | <b>r=0.287, P&lt;0.001</b> | <b><math>\beta</math>=0.310, P&lt;0.001</b> | P=0.610           | $\beta$ =0.042, P=0.578                     | P=0.267           | <b><math>\beta</math>=0.165, P=0.028</b>  |
|                        | DLB          | r=0.137, P=0.166           | $\beta$ =0.180, P=0.103                     | <b>P=0.049</b>    | <b><math>\beta</math>=0.269, P=0.016</b>    | P=0.361           | $\beta$ =-0.179, P=0.108                  |
|                        | AD           | <b>r=0.401, P&lt;0.001</b> | <b><math>\beta</math>=0.386, P=0.001</b>    | P=0.063           | $\beta$ =0.158, P=0.176                     | P=0.765           | $\beta$ =-0.020, P=0.858                  |
|                        | NC           | r=0.311, P=0.114           | $\beta$ =0.342, P=0.113                     | P=0.544           | $\beta$ =0.076, P=0.717                     | P=0.124           | $\beta$ =-0.326, P=0.110                  |
| Plasma YKL-40          | Whole cohort | <b>r=0.315, P&lt;0.001</b> | <b><math>\beta</math>=0.236, P=0.002</b>    | <b>P&lt;0.001</b> | <b><math>\beta</math>=0.198, P=0.008</b>    | P=0.122           | $\beta$ =-0.092, P=0.215                  |
|                        | DLB          | <b>r=0.333, P&lt;0.001</b> | <b><math>\beta</math>=0.264, P=0.019</b>    | P=0.072           | $\beta$ =0.149, P=0.182                     | P=0.864           | $\beta$ =-0.068, P=0.544                  |
|                        | AD           | <b>r=0.319, P=0.005</b>    | <b><math>\beta</math>=0.274, P=0.020</b>    | <b>P=0.003</b>    | <b><math>\beta</math>=0.281, P=0.018</b>    | P=0.923           | $\beta$ =-0.022, P=0.844                  |
|                        | NC           | r=0.239, P=0.230           | $\beta$ =0.191, P=0.389                     | P=0.368           | $\beta$ =0.149, P=0.501                     | P=0.238           | $\beta$ =-0.201, P=0.340                  |

Supplementary Table 4, Association of plasma biomarkers with age, sex and APOE  $\epsilon$ 4 carriership in the whole cohort and diagnosis subgroups.

Unadjusted associations of plasma biomarkers were studied with Spearman correlations for age and with Welch's-test for sex and APOE  $\epsilon$ 4 carriership. Adjusted analysis was performed using linear regression adjusting for age, sex, and APOE  $\epsilon$ 4 carriership. Standardized regression coefficient ( $\beta$ ) estimates and p-values are displayed for adjusted analysis. Significant associations or correlations are displayed in bold.

|                        | DLB versus NC |            | DLB versus AD     |            | DLB versus AD MCI |           | DLB versus AD dementia |           | AD versus NC      |            | A+ versus A- (whole cohort) |            |
|------------------------|---------------|------------|-------------------|------------|-------------------|-----------|------------------------|-----------|-------------------|------------|-----------------------------|------------|
|                        | AUC           | 95% CI     | AUC               | 95% CI     | AUC               | 95% CI    | AUC                    | 95% CI    | AUC               | 95% CI     | AUC                         | 95% CI     |
| Plasma A $\beta$ ratio | 0.77          | 0.66- 0.88 | 0.66              | 0.58- 0.73 | 0.73              | 0.61-0.85 | 0.70                   | 0.62-0.80 | 0.87              | 0.79- 0.96 | 0.72                        | 0.64- 0.79 |
| Plasma p-tau181        | 0.78          | 0.68- 0.87 | 0.80 <sup>a</sup> | 0.74- 0.87 | 0.79              | 0.71-0.88 | 0.83                   | 0.76-0.89 | 0.97 <sup>a</sup> | 0.93- 1.00 | 0.84 <sup>*</sup>           | 0.78- 0.90 |
| Plasma NfL             | 0.75          | 0.64- 0.85 | 0.67              | 0.59- 0.75 | 0.73              | 0.61-0.84 | 0.74                   | 0.66-0.82 | 0.85              | 0.75- 0.95 | 0.74                        | 0.67- 0.81 |
| Plasma GFAP            | 0.76          | 0.66- 0.86 | 0.72              | 0.65- 0.80 | 0.74              | 0.63-0.84 | 0.79                   | 0.71-0.86 | 0.91              | 0.84- 0.97 | 0.78                        | 0.72- 0.85 |
| Plasma sTREM2          | 0.75          | 0.65- 0.85 | 0.65              | 0.57- 0.74 | 0.73              | 0.62-0.84 | 0.69                   | 0.59-0.79 | 0.78              | 0.67- 0.88 | 0.67                        | 0.59- 0.74 |
| Plasma YKL-40          | 0.74          | 0.63- 0.84 | 0.63              | 0.54- 0.71 | 0.75              | 0.65-0.85 | 0.65                   | 0.55-0.74 | 0.79              | 0.70- 0.88 | 0.65                        | 0.57- 0.72 |

#### Supplementary Table 4, Plasma biomarkers performance for diagnosis

Areas under the curve (AUC) were calculated using ROC analysis and binary logistic regression models, including the biomarker, age, and sex, to evaluate the performance of each biomarker for distinguishing between diagnostic groups and to identify amyloid positivity. Akaike information criterion (AIC) was calculated for each logistic regression model. <sup>a</sup>the model including p-tau181 outperformed all other models ( $\Delta$ AIC>4) Abbreviations: AD, Alzheimer's disease; AUC, area under the curve; DLB, dementia with Lewy bodies; GFAP, glial fibrillary acidic protein; NC, neurological controls; NfL, neurofilament light chain; 95% CI, 95% confidence interval

|                        | Whole cohort                |                                                                     | NC                       |                                        | AD                        |                                         | DLB                       |                                        |
|------------------------|-----------------------------|---------------------------------------------------------------------|--------------------------|----------------------------------------|---------------------------|-----------------------------------------|---------------------------|----------------------------------------|
|                        | Unadjusted                  | Adjusted on sex, age, LoE                                           | Unadjusted               | Adjusted on sex, age, LoE              | Unadjusted                | Adjusted on sex, age, LoE               | Unadjusted                | Adjusted on sex, age, LoE              |
| Plasma A $\beta$ ratio | <b>r=-0.194 (P=0.007)</b>   | $\beta=0.092$ (-0.224-0.040), P=0.171                               | r=-0.049 (P=0.816)       | $\beta=0.016$ (-0.490-0.459), P=0.946  | r=-0.071 (P=0.554)        | $\beta=0.013$ (-0.216-0.242), P=0.908   | r=0.059 (P=0.573)         | $\beta=-0.116$ (-0.073-0.305), P=0.226 |
| Plasma p-tau181        | <b>r=0.461 (P&lt; .001)</b> | <b><math>\beta=-0.378</math> (-0.253-<b>-0.503</b>), P&lt; .001</b> | r=0.119 (P=0.570)        | $\beta=-0.065$ (-0.453-0.583), P=0.796 | r=0.142 (P=0.239)         | $\beta=0.082$ (-0.147-0.311), P=0.477   | <b>r=-0.231 (P=0.024)</b> | $\beta=-0.176$ (-0.016-0.369), P=0.072 |
| Plasma GFAP            | <b>r=0.444 (P&lt; .001)</b> | <b><math>\beta=-0.373</math> (-0.229-<b>-0.517</b>), P&lt; .001</b> | r=0.365 (P=0.073)        | $\beta=-0.464$ (-0.046-0.974), P=0.072 | <b>r=-0.253 (P=0.032)</b> | $\beta=0.214$ (-0.016-0.444), P=0.067   | r=-0.156 (P=0.134)        | $\beta=-0.049$ (-0.188-0.286), P=0.681 |
| Plasma NfL             | <b>r=0.327 (P&lt; .001)</b> | <b><math>\beta=-0.178</math> (-0.032-<b>-0.325</b>), P=0.017</b>    | r=-0.010 (P=0.964)       | $\beta=0.087$ (-0.638-0.463), P=0.744  | r=0.161 (P=0.178)         | $\beta=0.207$ (-0.0369-0.4500), P=0.095 | r=-0.139 (P=0.183)        | $\beta=-0.040$ (-0.170-0.250), P=0.705 |
| Plasma sTREM2          | r=-0.121 (P=0.090)          | <b><math>\beta=-0.139</math> (-0.273-<b>-0.0038</b>), P=0.044</b>   | <b>r=0.402 (P=0.042)</b> | $\beta=-0.429$ (-0.015-0.873), P=0.058 | r=-0.208 (P=0.075)        | $\beta=-0.005$ (-0.258-0.247), P=0.968  | r=-0.136 (P=0.183)        | $\beta=0.170$ (-0.365-0.025), P=0.087  |
| Plasma YKL-40          | r=0.010 (P=0.889)           | $\beta=0.094$ (-0.231-0.042), P=0.175                               | r=0.350 (P=0.079)        | $\beta=-0.371$ (-0.068-0.810), P=0.094 | r=-0.016 (P=0.894)        | $\beta=0.089$ (-0.155-0.332), P=0.468   | r=-0.012 (P=0.909)        | $\beta=0.132$ (-0.325-0.061), P=0.177  |

**Supplementary Table 5, Association of MMSE with plasma biomarkers levels in the whole cohort and in the diagnosis subgroups.**

Unadjusted analysis was studied with Spearman's r correlations. Adjusted analysis on age, sex and level of education was performed using linear regression with post Hoc Tukey's adjusting for multiple comparisons. Standardised regression coefficient ( $\beta$ ) estimates and p-values are displayed for adjusted analysis.

Abbreviations: AD, Alzheimer's disease; DLB, dementia with Lewy bodies; GFAP, glial fibrillary acidic protein; LoE, level of education; MMSE, mini mental state examination; NC, neurological controls; NfL, neurofilament light chain; p-tau181, tau phosphorylated at serine 181; sTREM-2, soluble triggering receptor expressed myeloid-
